# Supplementary material for: HIF-3α1 promotes colorectal tumor cell growth by activation of JAK-STAT3 signaling
Source: PubMed Central journal article supplement (PMC4905494; doi:10.18632/oncotarget.7272), 2016-02-09
Supplement: oncotarget-07-11567-s001.pdf [file oncotarget-07-11567-s001.pdf]

## HIF-3 $\alpha$ 1 promotes colorectal tumor cell growth by activation of JAK-STAT3 signaling

### Supplementary Materials

Supplementary Table S1: Primers list

| QPCR Primer                       | Sequence (5'-3')        |
|-----------------------------------|-------------------------|
| <i><math>\beta</math>-ACTIN</i> F | TATTGGCAACGAGCGGTTCC    |
| <i><math>\beta</math>-ACTIN</i> R | GGCATAGAGGTCTTTACGGATGT |
| <i>HIF-3<math>\alpha</math></i> F | CCCAGTCGGAGAGTATCGTC    |
| <i>HIF-3<math>\alpha</math></i> R | GAATGGGTCTGCGAGAGTGT    |
| <i>SOCS3</i> F                    | GAGCCAGCGTGGATCTG       |
| <i>SOCS3</i> R                    | GGCTCAGCCCCAAGGAC       |
| <i>STAT3</i> F                    | CTGCTCCAGGTACCGTGTGT    |
| <i>STAT3</i> R                    | CCTCTGCCGGAGAAACAG      |
| <i>IL6</i> F                      | GTCAGGGGTGGTTATTGCAT    |
| <i>IL6</i> R                      | AGTGAGGAACAAGCCAGAGC    |
| <i>IL6R</i> F                     | ACTGGTCAGCACGCCTCT      |
| <i>IL6R</i> R                     | GGGACCATGGAGTGGTAGC     |
| <i>GP130</i> F                    | CGGACAGCTTGAACAGAATGT   |
| <i>GP130</i> R                    | ACCATCCCCTCACACCTCA     |
| <i>JAK1</i> F                     | GAATGACGCCACACTGACTG    |
| <i>JAK1</i> R                     | GATGACAAGATGTCCCTCCG    |
| <i>JAK2</i> F                     | CCATTCCCATGCAGAGTCTT    |
| <i>JAK2</i> R                     | CAGGCAACAGGAACAAGATG    |

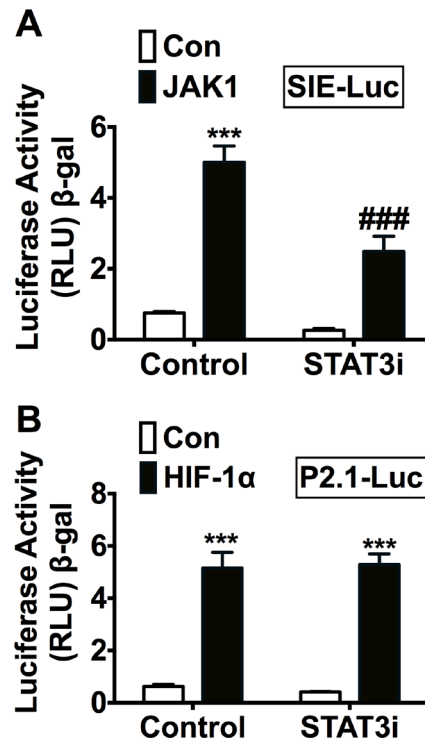

**Supplementary Figure S1: STAT3i specifically inhibits the activation of STAT3.** (A) STAT3 activity luciferase assay in HCT116 CRC cells transfected with JAK1 or control (Con) plasmids and treated with or without STAT3i (100  $\mu$ M) for 24 hours. (B) Enolase promoter (P2.1) luciferase assay in HCT116 CRC cells transfected with HIF-1 $\alpha$  or control plasmids and treated with or without STAT3i (100  $\mu$ M) for 24 hours. \*\*\* $p$  < 0.001 compared with con plasmid. ### $p$  < 0.001 compared with untreated control cells.
